# Supplementary material
Source: PubMed Central journal article supplement (PMC5470041)

# Source data for Fig1 A

GluA1

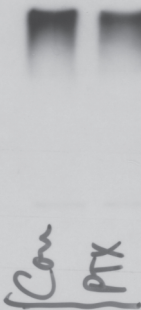

Tubulin

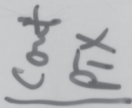

Supplement: EMBJ-36-1770-s014.pdf [file EMBJ-36-1770-s014.pdf]

Source data for Fig4 E

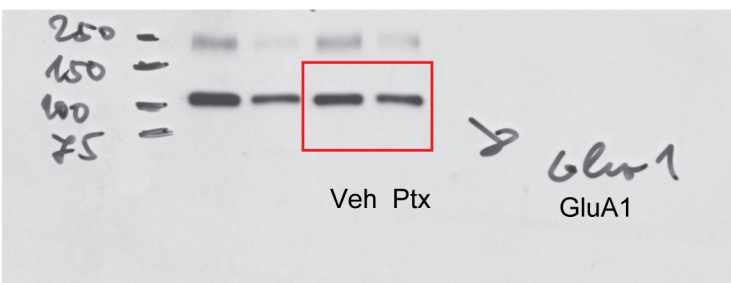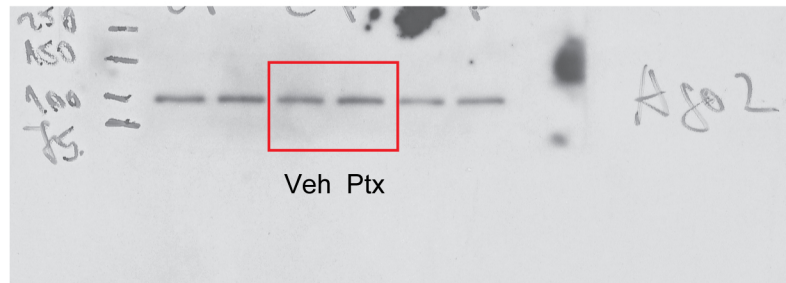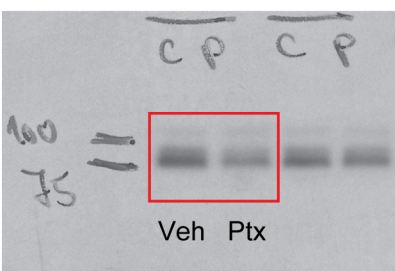

Syn1

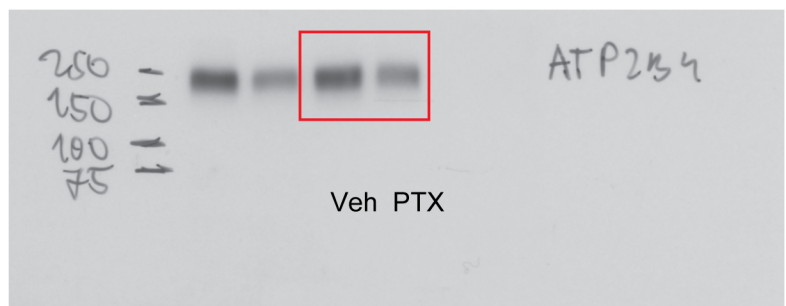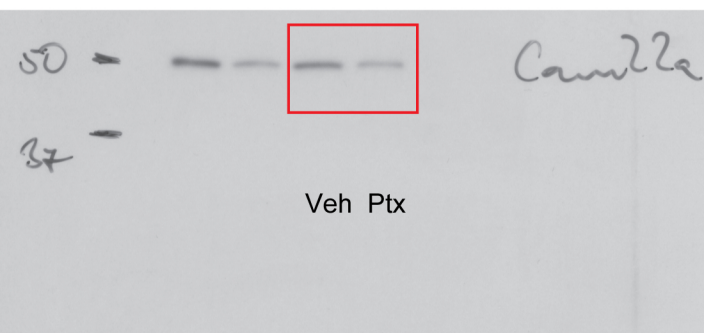

Veh Ptx

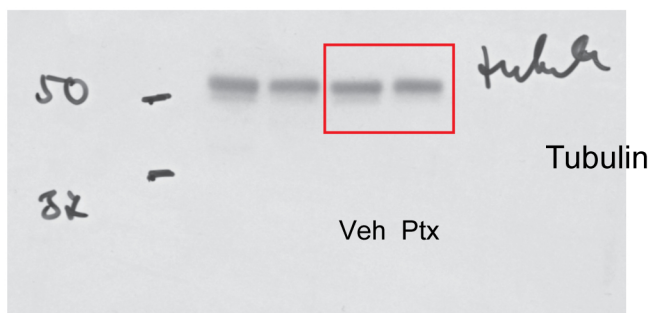

Veh Ptx

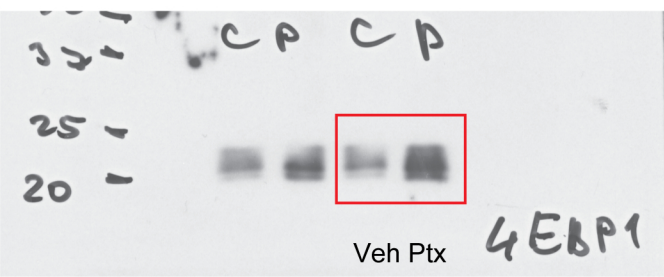

Veh Ptx

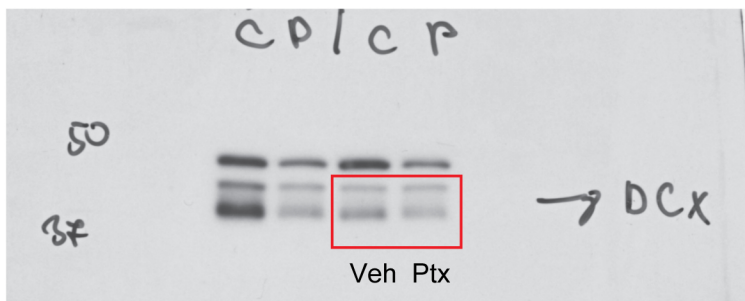

Veh Ptx

Supplement: EMBJ-36-1770-s015.pdf [file EMBJ-36-1770-s015.pdf]

Source data for Fig5 C

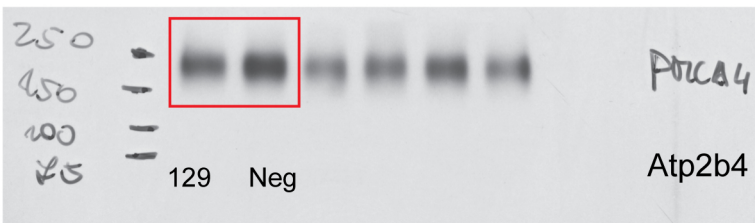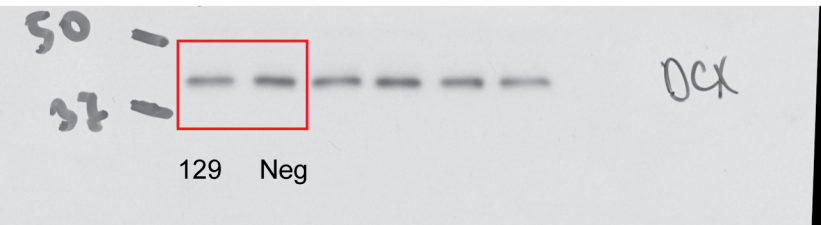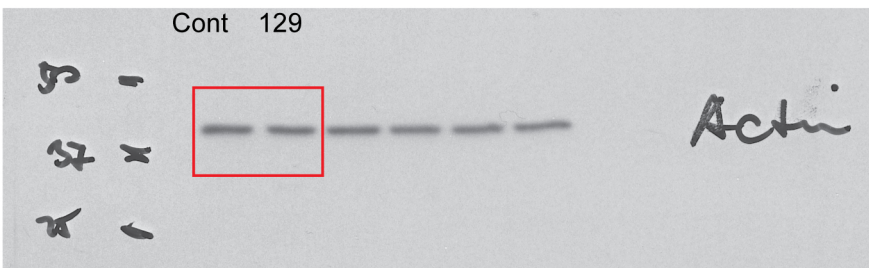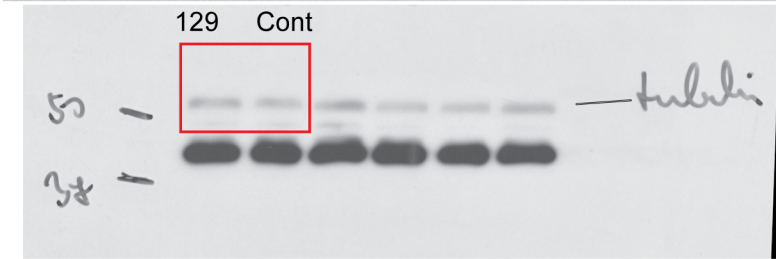

# Source data for Fig5 F

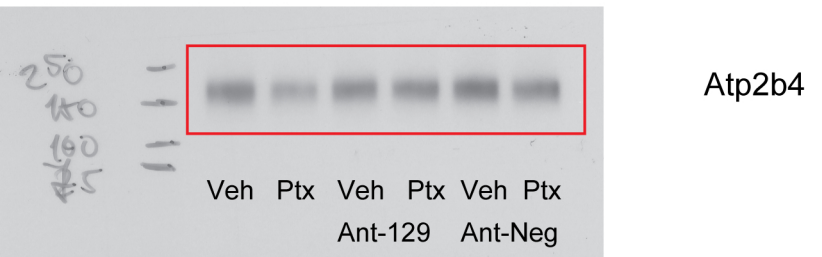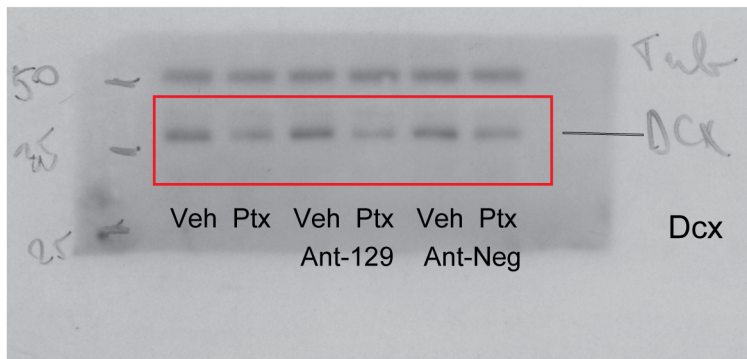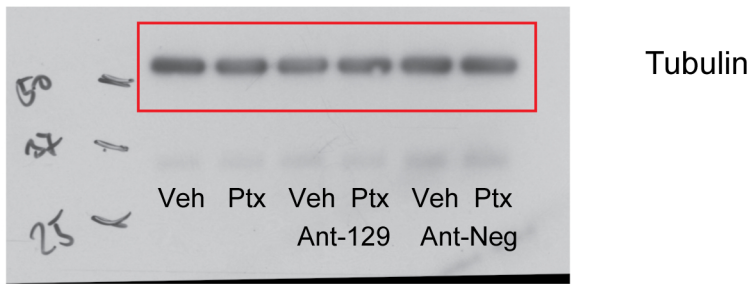

Supplement: EMBJ-36-1770-s016.pdf [file EMBJ-36-1770-s016.pdf]

# Source data for Fig7 D

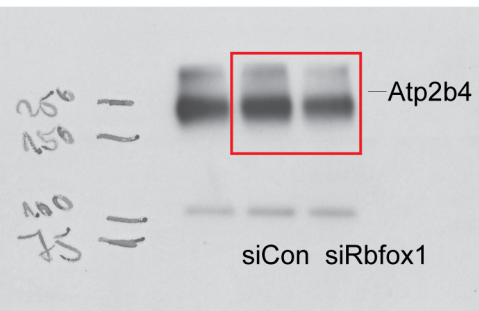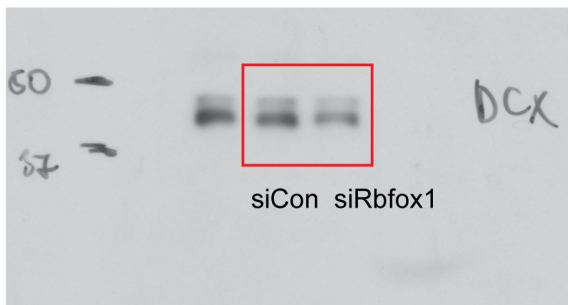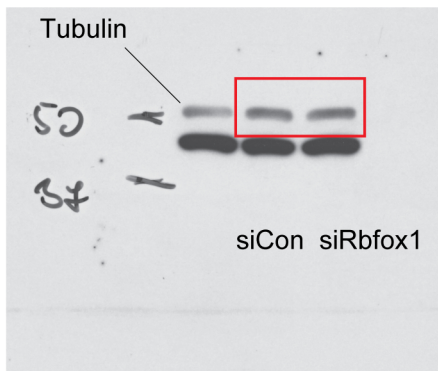

Supplement: EMBJ-36-1770-s017.pdf [file EMBJ-36-1770-s017.pdf]

Source data for Fig8 A

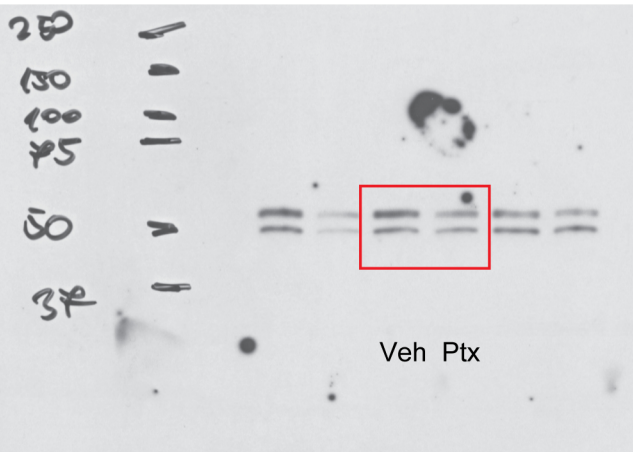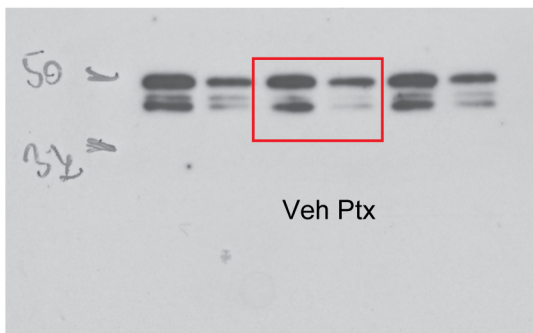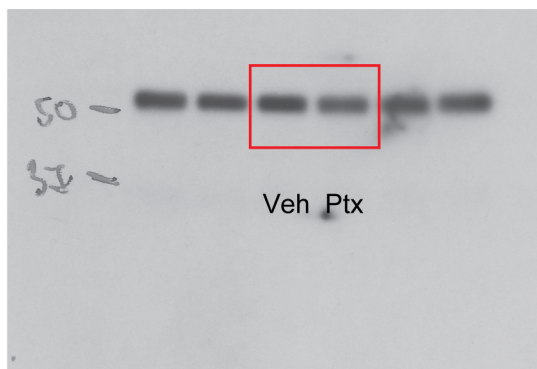

Source data for Fig8 C

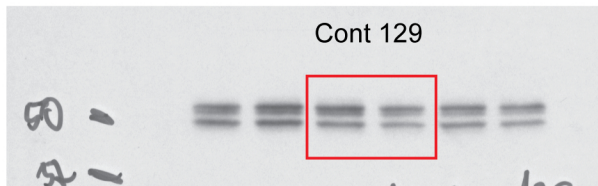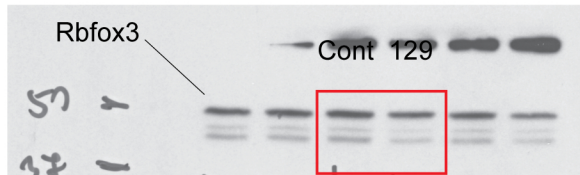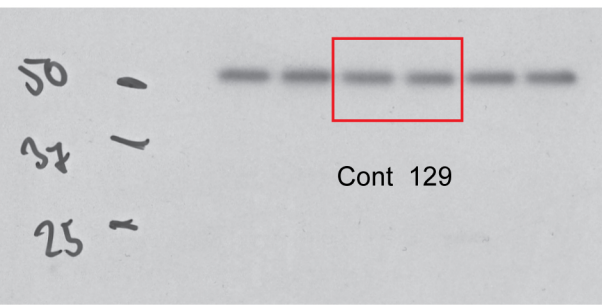

# Source data for Fig8 F

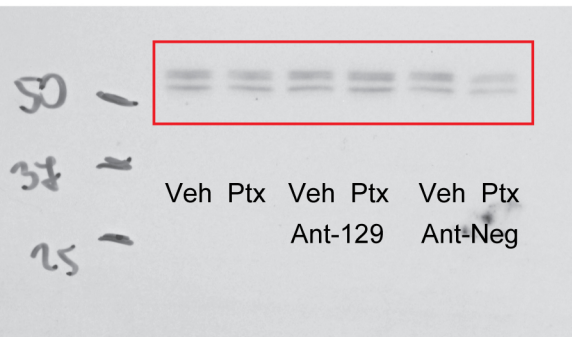

Rbfox1

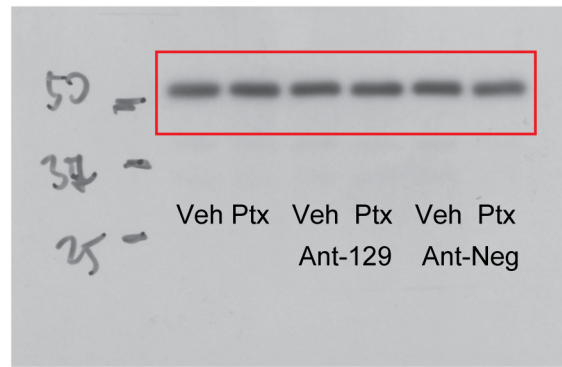

Tubulin

Supplement: EMBJ-36-1770-s018.pdf [file EMBJ-36-1770-s018.pdf]
